# Supplementary material for: Circulating Cell Biomarkers in Pulmonary Arterial Hypertension: Relationship with Clinical Heterogeneity and Therapeutic Response
Source: MDPI journal article supplement (doi:10.3390/cells10071688), 2021-07-04
Supplement: s1 [file s1]

---

**ONLINE RESOURCE**

# Circulating Cell Biomarkers in Pulmonary Arterial Hypertension: Relationship with Clinical Heterogeneity and Therapeutic Response

**Running title:** Biomarkers in pulmonary arterial hypertension.

Olga Tura-Ceide <sup>1,2,3,\*</sup>, Isabel Blanco <sup>1,2</sup>, Jéssica Garcia-Lucio <sup>1</sup>, Roberto del Pozo <sup>1</sup>, Agustín Roberto García <sup>1</sup>, Elisabet Ferrer <sup>1</sup>, Isabel Crespo <sup>4</sup>, Diego A. Rodríguez-Chiaradia <sup>2,5</sup>, Carmen Pilar Simeon-Aznar <sup>6</sup>, Manuel López-Meseguer <sup>7</sup>, Clara Martín-Ontiyuelo <sup>1</sup>, Víctor I. Peinado <sup>1,2</sup> and Joan Albert Barberà <sup>1,2,\*</sup>

<sup>1</sup> Department of Pulmonary Medicine, Hospital Clínic-Institut d'Investigacions Biomèdiques August Pi i Sunyer (IDIBAPS), University of Barcelona, 08036 Barcelona, Spain; iblanco2@clinic.cat (I.B.); jss5@hotmail.com (J.G.-L.); rdelpozo81@gmail.com (R.d.P.); garcia83@clinic.cat (A.R.G.); elisabet.ferrer7@gmail.com (E.F.); clmartin@clinic.cat (C.M.-O.); vpeinado@clinic.cat (V.I.P.)

<sup>2</sup> Biomedical Research Networking Centre on Respiratory Diseases (CIBERES), 28029 Madrid, Spain; darodriguez@padesalutmar.cat

<sup>3</sup> Girona Biomedical Research Institute (IDIBGI), 17190 Girona, Spain

<sup>4</sup> Flow Cytometry and Cell Sorting Facility, Institut d'Investigacions Biomèdiques August Pi i Sunyer (IDIBAPS), 08036 Barcelona, Spain; isabel.crespo@idibaps.org

<sup>5</sup> Pulmonology Department, Hospital del Mar, Institut Hospital del Mar d'Investigacions Mèdiques (IMIM), Universitat Pompeu Fabra (UPF), 08003 Barcelona, Spain

<sup>6</sup> Unitat de Malalties Autoimmunes Sistèmiques. Servei de Medicina Interna Hospital Universitari Vall d'Hebron, Departament de Medicina, Universitat Autònoma de Barcelona, 08035 Barcelona, Spain; cpsimeon@vhebron.net

<sup>7</sup> Servei de Pneumologia, Hospital Universitari Vall d'Hebron, Departament de Medicina, Universitat Autònoma de Barcelona, 08035 Barcelona, Spain; manuellopez@vhebron.net

\* Correspondence: tura@clinic.cat (O.T.-C.); jbarbera@clinic.cat (J.A.B.); Tel.: 34-93-227-5747 (J.A.B.); Fax: 34-93-227-5455 (J.A.B.)

**Keywords:** Pulmonary arterial hypertension; endothelial dysfunction; biomarkers; progenitor cells; endothelial extracellular vesicles; PAH-specific treatment

---

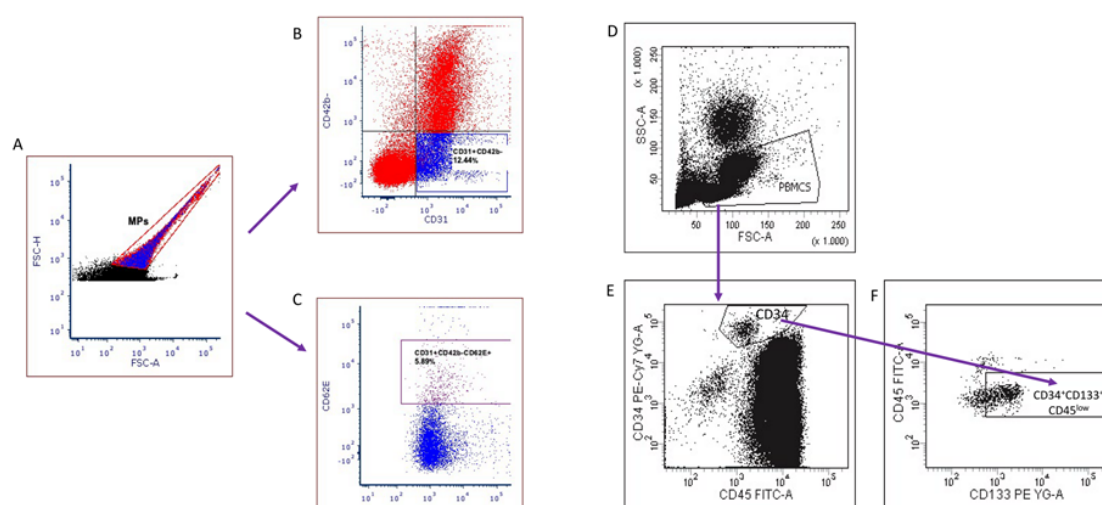

**Figure S1. Gating strategy for endothelial microvesicles (EMVs) and for progenitor cells (PCs).**

A) MP analysis based on size and fluorescence; B) Sample analysed by two-colour fluorescence dot-plot as CD31<sup>+</sup>CD42b<sup>-</sup> (total EMVs); C) sample analysed by three colour fluorescence dot plot as CD31<sup>+</sup>CD42b<sup>-</sup>CD62E<sup>+</sup> (activated EMVs). D) Peripheral blood mononuclear cells (PBMNCs) selection based on forward and side scatter; E) Sample analysed by two colour fluorescence dot plot as CD34<sup>+</sup>CD45<sup>low</sup> cells and F) sample analysed by three-colour fluorescence dot plot as CD34<sup>+</sup>CD133<sup>+</sup>CD45<sup>low</sup> cells.

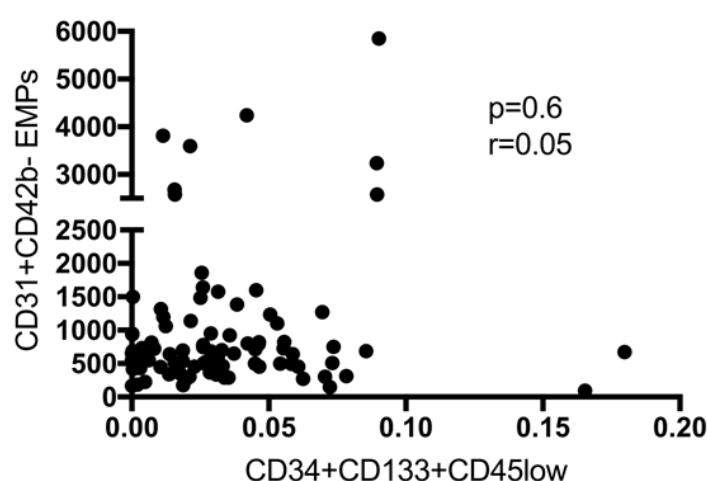

**Figure S2 Correlation between circulating endothelial microvesicles (EMVs) and progenitor cells (PCs).** Correlation between EMVs and PCs in all PAH patients. Spearman's rank correlation coefficient.

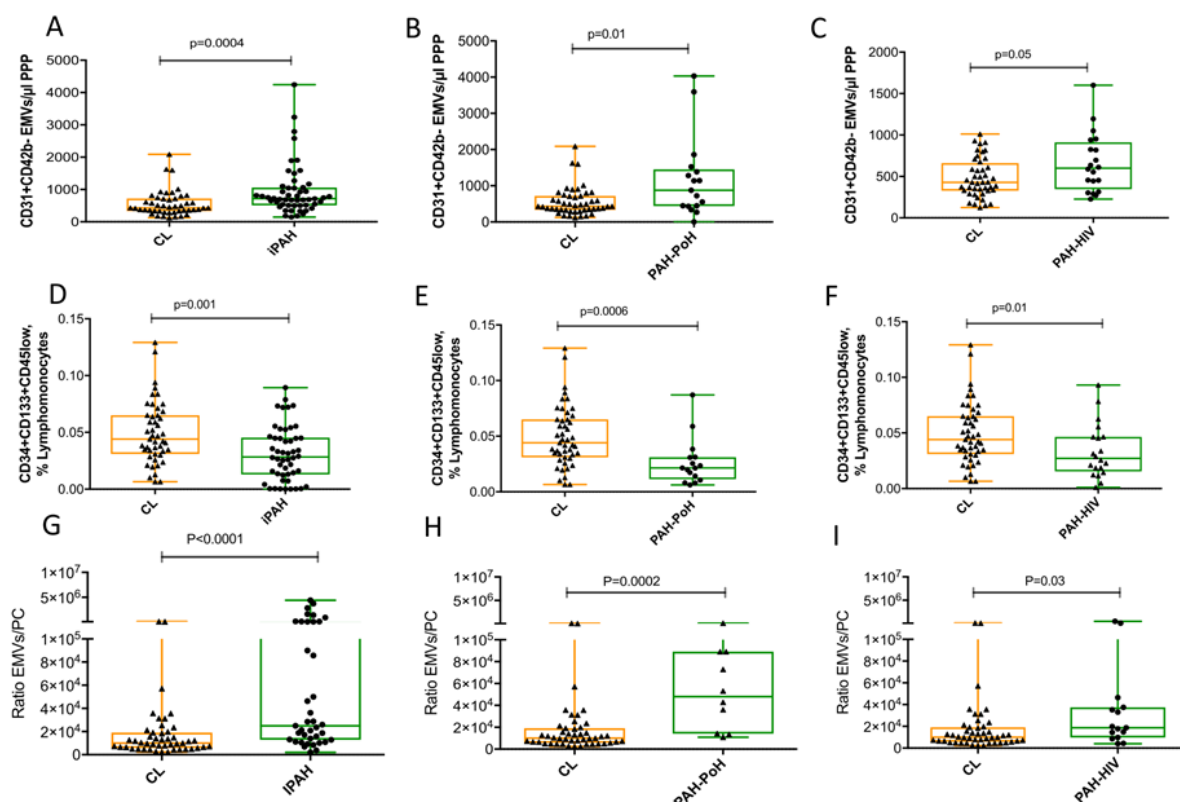

**Figure S3.** Number of circulating endothelial microvesicles (EMVs), percentage of circulating progenitor cells (PCs) and EMVs/PCs ratio in iPAH, PAH-PoH and PAH-HIV patients and healthy controls. A) Number of EMVs in controls and iPAH; B) Number of EMVs in controls and PAH-PoH; C) B) Number of EMVs in controls and PAH-HIV; D) Percentage of circulating progenitor cells (PCs) in controls and iPAH; E) Percentage of circulating progenitor cells (PCs) in controls and PAH-PoH; F) Percentage of circulating progenitor cells (PCs) in controls and PAH-HIV; G) EMVs/PCs ratio in controls and iPAH; H) EMVs/PCs ratio in controls and PAH-PoH; I) EMVs/PCs ratio in controls and PAH-HIV. The whiskers extend from the minimum to maximum points. Mann Whitney Rank Sum test, \*  $p < 0.05$ .

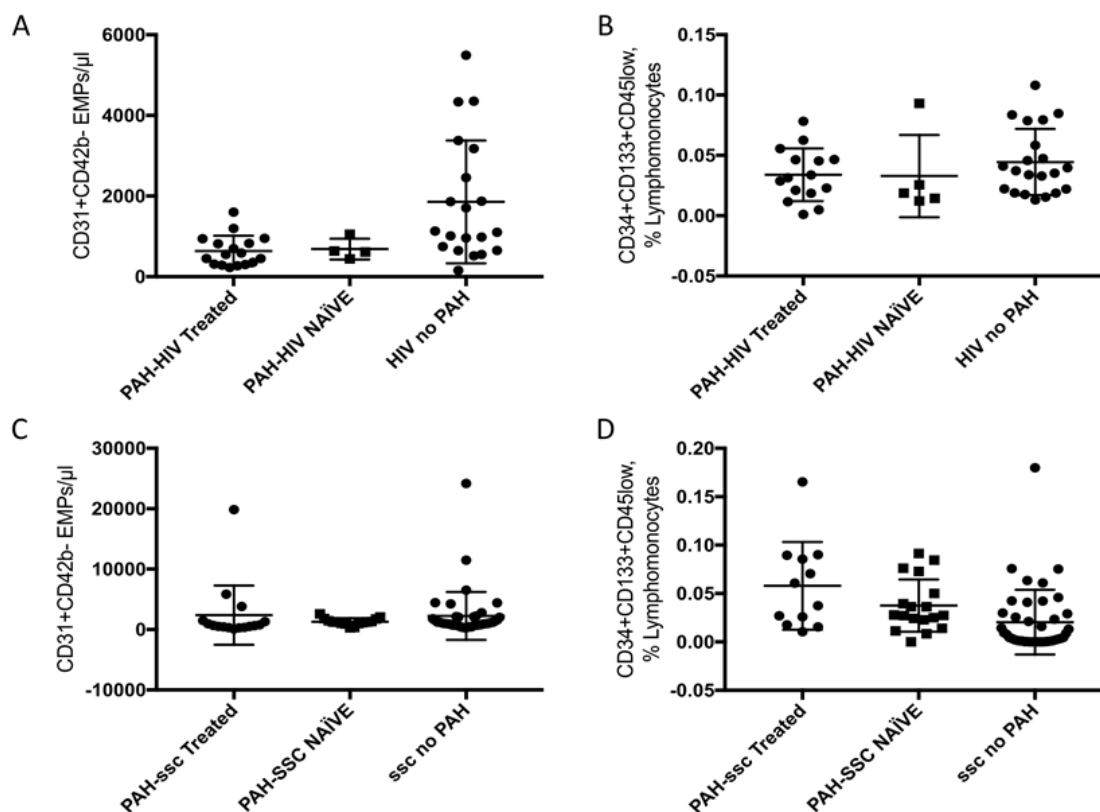

**Figure S4.** Number of circulating endothelial microvesicles (EMVs) and percentage of circulating progenitor cells (PCs) in PAH-HIV (A-B) and PAH-SSc (C-D) with and without PAH. PAH-HIV (AB) and PAH-SSc patients (C-D) were separated into treatment naïve patients and prevalent patients receiving PAH-specific therapy. Kruskal-Wallis One Way Analysis of Variance,  $p > 0.05$ .

**Table S1. Clinical and hemodynamic characteristics in SSc and HIV patients with and without PAH and healthy controls.**

| Variables                                  | CL<br>n=47   | SSc<br>n=44              | SSc-PAH<br>n=31            | HIV<br>n=22            | HIV-PAH<br>n=20            |
|--------------------------------------------|--------------|--------------------------|----------------------------|------------------------|----------------------------|
| Age, years                                 | 48.0 ± 14.3  | 53.9 ± 10.1              | 64.4 ± 11.2 <sup>†\$</sup> | 43.3 ± 9.3             | 46.2 ± 6.7                 |
| Male sex n (%)                             | 20 (42.5%)   | 5 (11.3%) <sup>†</sup>   | 3 (9.6%) <sup>†</sup>      | 19 (86.3%)*            | 10 (50%) <sup>#</sup>      |
| BMI (Kg/m <sup>2</sup> )                   | 25.3 ± 4.0   | 25.7 ± 4.4               | 26.3 ± 4.7                 | 25.3 ± 4.0             | 23.0 ± 4.3                 |
| FVC(% predicted)                           | 101.3 ± 12.6 | 100.4 ± 15.3             | 78.3 ± 18.9 <sup>†\$</sup> | 105.8 ± 13.9           | 94.0 ± 16.2                |
| FEV <sub>1</sub> (% predicted)             | 102.8 ± 13.2 | 101.3 ± 12.8             | 77.3 ± 19.5 <sup>†\$</sup> | 97.6 ± 16.2            | 83.5 ± 17.9 <sup>*#</sup>  |
| FEV <sub>1</sub> /FVC (%)                  | 83.6 ± 6.0   | 79.0 ± 5.3 <sup>†</sup>  | 73.6 ± 6.4 <sup>†\$</sup>  | 74.5 ± 8.1*            | 70.0 ± 9.9*                |
| TLC (% predicted)                          | 103.2 ± 10.6 | 103.5 ± 16.0             | 84.2 ± 15.7 <sup>†\$</sup> | 105 ± 13.3             | 98.7 ± 12.6                |
| DLco(% predicted)                          | 91.9 ± 14.6  | 73.4 ± 12.2 <sup>†</sup> | 48.2 ± 16.8 <sup>†\$</sup> | 87.8 ± 9.4             | 53.1 ± 9.9 <sup>#</sup>    |
| DLCO/VA                                    | 101 ± 21.9   | 78.3 ± 12.5              | 63.9 ± 14.4 <sup>†\$</sup> | 86.5 ± 14.4            | 58.6 ± 16.7 <sup>#</sup>   |
| PaO <sub>2</sub> (mmHg)                    | ND           | ND                       | 63.9 ± 14.4                | ND                     | 76.5 ± 14.2                |
| PAPm (mmHg)                                | ND           | ND                       | 42.4 ± 13.5*               | ND                     | 51.3 ± 13.7                |
| PAWP (mmHg)                                | ND           | ND                       | 9.4 ± 3.1                  | ND                     | 9.2 ± 4.3                  |
| RAP (mmHg)                                 | ND           | ND                       | 9.3 ± 5.6                  | ND                     | 7.4 ± 4.4                  |
| CI, (L.m <sup>2</sup> .min <sup>-1</sup> ) | ND           | ND                       | 2.3 ± 0.5                  | ND                     | 2.3 ± 0.7                  |
| PVR (dyn.sec.cm <sup>5</sup> )             | ND           | ND                       | 682.3 ± 361.5              | ND                     | 894.5 ± 573.3              |
| BNP (pg/ml)                                | 16.8 ± 4.3   | 47.9 ± 51.5 <sup>†</sup> | 327 ± 314.2 <sup>†\$</sup> | 18.5 ± 22.6            | 199.5 ± 296.5 <sup>#</sup> |
| WHO FC n, (%)                              |              |                          |                            |                        |                            |
| I                                          | 47 (100)     | 43 (97.7)                | 1 (3.2) <sup>†\$</sup>     | 18 (81.1) <sup>#</sup> | 3 (15.0) <sup>##</sup>     |
| II                                         | 0 (0)        | 0 (0)                    | 11 (35.4)                  | 2 (9.0)                | 11 (55.0)                  |
| III-IV                                     | 0 (0)        | 1 (2.2)                  | 19 (61.3)                  | 2 (9.0)                | 6 (30.0)                   |

Data are shown as mean ± SD. Definition of abbreviations: PAH: pulmonary arterial hypertension; CL: healthy controls; BMI: body mass index; FVC: forced vital capacity; FEV<sub>1</sub>: forced expiratory volume in the first second; TLC: total lung capacity; DLco: diffusing capacity of the lung for carbon monoxide; PaO<sub>2</sub>: arterial partial oxygen pressure; mPAP: mean pulmonary arterial pressure; PAWP: pulmonary artery wedge pressure; RAP: right atrial pressure; CI: cardiac index; PVR: pulmonary vascular resistance; BNP: brain natriuretic peptide, WHO FC: functional class world health organization; and ND: not determined. \*p<0.05 HIV-PAH compared to controls, #p<0.05 HIV-PAH compared to HIV, †P<0.05 SSc with or without PAH compared to CL, \$ P<0.05 SSc-PAH compared to SSc, Kruskal-Wallis test followed by post-hoc Dunn's multiple comparisons test.

**Table S2. Clinical characteristics and circulating EMVs and PCs count before and after PAH-targeted treatment.**

|                                   | Pre-treatment                             | Post-treatment                            | P-value | n  |
|-----------------------------------|-------------------------------------------|-------------------------------------------|---------|----|
| <b>6MWD, mts</b>                  | 343 ± 148                                 | 392 ± 147                                 | 0.005*  | 53 |
| <b>BNP, pg/mL</b>                 | 311 ± 327                                 | 144 ± 171                                 | <0.001* | 53 |
| <b>NYHA FC III-IV, n (%)</b>      | 32 (59.3)                                 | 18 (33.3)                                 | 0.02 *  | 53 |
| <b>mPAP, mmHg</b>                 | 51 ± 16                                   | 45 ± 13                                   | 0.42    | 12 |
| <b>CI, L/min/m<sup>2</sup></b>    | 2.3 ± 0.6                                 | 2.8 ± 0.5                                 | 0.04 *  | 12 |
| <b>RAP, mmHg</b>                  | 8 ± 4                                     | 5 ± 2                                     | 0.16    | 12 |
| <b>PVR, dyn.s.cm<sup>-5</sup></b> | 863 ± 412                                 | 518 ± 289                                 | 0.04 *  | 12 |
| <b>PCs</b>                        | 0.03 ± 0.02                               | 0.03 ± 0.02                               | 0.97    | 53 |
| <b>EMVs</b>                       | 1050 ± 697.5                              | 1359 ± 1061                               | 0.15    | 53 |
| <b>Ratio EMVs/PCs</b>             | 3.9x10 <sup>4</sup> ± 3.4x10 <sup>4</sup> | 5.5x10 <sup>4</sup> ± 6.0x10 <sup>4</sup> | 0.45    | 53 |

Data are shown as mean± SD. Definition of abbreviations: 6MWD: six-minute walking distance; BNP: brain natriuretic peptide; NYHA FC: New York heart association functional class; mPAP: mean pulmonary arterial pressure; CI: cardiac index; RAP: right atrial pressure; PVR: pulmonary vascular resistance; PCs: progenitor cells; EMVs: endothelial microvesicles. Student's t-test for normally distributed variables, or Mann Whitney Rank Sum test for non-normally distributed variables, \*p<0.05.

**Table S3. Correlations between the number of PCs, EMVs and EMV/PC ratio and clinical features**

|                          | <b>mPAP<br/>(mmHg)</b> | <b>CI<br/>(L/min/m<sup>2</sup>)</b> | <b>RAP<br/>(mmHg)</b> | <b>PVR<br/>(dyn.seg.cm<sup>-5</sup>)</b> | <b>6MWD<br/>(mts)</b> | <b>BNP<br/>(pg/ml)</b> | <b>DLCO<br/>(%)</b> | <b>NYHA-FC</b>    |
|--------------------------|------------------------|-------------------------------------|-----------------------|------------------------------------------|-----------------------|------------------------|---------------------|-------------------|
| <b>PCs</b>               | r=0.17,<br>p=0.2       | r=0.25,<br>p=0.1                    | r=0.02,<br>p=0.86     | r=0.25,<br>p=0.1                         | r=0.09,<br>p=0.55     | r=0.21,<br>p=0.18      | r=-0.22,<br>p=0.15  | r=0.14<br>p=0.33  |
| <b>EMVs</b>              | r=0.08,<br>p=0.6       | r=0.05,<br>p=0.7                    | r=0.08,<br>p=0.58     | r=0.01,<br>p=0.94                        | r=-0.07,<br>p=0.65    | r=0.17,<br>p=0.28      | r=-0.14,<br>p=0.36  | r=0.12<br>p=0.41  |
| <b>EMVs/PC<br/>ratio</b> | r=-0.10,<br>p=0.52     | r=0.29,<br>p=0.06                   | r=0.08,<br>p=0.59     | r=-0.23,<br>p=0.13                       | r=0.05,<br>p=0.76     | r=-0.05,<br>p=0.76     | r=0.16,<br>p=0.30   | r=-0.09<br>p=0.54 |

Definition of abbreviations: PCs: progenitor cells; EMVs: endothelial microvesicles. mPAP: mean pulmonary arterial pressure; RAP: right atrial pressure; CI: cardiac index; PVR: pulmonary vascular resistance; 6MWD: six-minute walking distance; BNP: brain natriuretic peptide; DLco: diffusing capacity of the lung for carbon monoxide; NYHA-FC: New York heart association functional class. Spearman's rank correlation coefficient.

**Table S4: Differences in hemodynamic severity at basal and after 3 months PAH-targeted treatment considering increase or not increase of PCs.**

|                                | <b>Increase PCs (n=5)</b> |                  |                | <b>No increase PCs (n=7)</b> |                  |                |
|--------------------------------|---------------------------|------------------|----------------|------------------------------|------------------|----------------|
|                                | <b>Basal</b>              | <b>Follow-up</b> | <b>p-value</b> | <b>Basal</b>                 | <b>Follow-up</b> | <b>p-value</b> |
| <b>mPAP, mmHg</b>              | 49 ± 7                    | 45 ± 14          | 0.522          | 52 ± 20                      | 43 ± 13          | 0.434          |
| <b>PVR, UW</b>                 | 11.6 ± 3.7                | 5.5 ± 1.6        | 0.083          | 10.1 ± 7.2                   | 7.3 ± 4.7        | 0.349          |
| <b>CI, L/min/m<sup>2</sup></b> | 2.06 ± 0.43               | 3.05 ± 0.4       | 0.004 *        | 2.57 ± 0.6                   | 2.80 ± 0.76      | 0.166          |
| <b>RAP, mmHg</b>               | 6 ± 3                     | 10 ± 6           | 0.401          | 6 ± 3                        | 7 ± 3            | 0.252          |

Definition of abbreviations: PCs: progenitor cells; mPAP: mean pulmonary arterial pressure; PVR: pulmonary vascular resistance; CI: cardiac index; RAP: right atrial pressure. Student's t-test \*p<0.05.
